# Supplementary material for: Metabolomics Differences of Glycine max QTLs Resistant to Soybean Looper
Source: Metabolites. 2021 Oct 19;11(10):710. doi: 10.3390/metabo11100710 (PMC8539317; doi:10.3390/metabo11100710)
Supplement: Supplementary file 1 [file metabolites-11-00710-s001.zip › Table S1. MS peaks.xlsx]

## Sheet: Sheet1
Table S1. MS peaks from insect-resistant QTLs that were significantly different from insect-susceptible parent Benning.a
Treatment	Mock								Insect
QTL	E	M	EM	E&M	E&EM	M&EM	E&M&EM		E	M	EM	E&M	E&EM	M&EM	E&M&EM
m/z [M+H]+	707.1	707.1	707.1	707.1	707.1	707.1	707.1		277	277	277	277	277	277	277
	707	707	707	707	707	707	707		276.9	276.9	276.9	276.9	276.9	276.9	276.9
	706.9	706.9	706.9	706.9	706.9	706.9	706.9		276.8	276.8	276.8	276.8	276.8	276.8	276.8
	664.8	664.8	664.8	664.8	664.8	664.8	664.8		276.7	276.7	276.7	276.7	276.7	276.7	276.7
	544	544	544	544	544	544	544		108.6	108.6	108.6	108.6	108.6	108.6	108.6
	514.9	514.9	514.9	514.9	514.9	514.9	514.9		1216.3	1216.3	339.5	1216.3	339.5	1064.6
	244.8	244.8	244.8	244.8	244.8	244.8	244.8		121.3	121.3	326.7	121.3	326.7	1064.5
	226.7	226.7	226.7	226.7	226.7	226.7	226.7		108.5	108.5	299.5	108.5	299.5	1064.4
	226.6	226.6	226.6	226.6	226.6	226.6	226.6		339.5	1064.6	262.6		262.6	278
	812.2	812.2	721.1	812.2	721.1	825.1			326.7	1064.5	246.3		246.3	277.2
	810.9	810.9	541.7	810.9	541.7	725			299.5	1064.4	246.2		246.2	277.1
	703.1	703.1	531.2	703.1	531.2	709			262.6	278	246.1		246.1	216.7
	703	703	531.1	703	531.1	708.9			246.3	277.2	246		246	128.4
	664.9	664.9	515.2	664.9	515.2	603.2			246.2	277.1	245.5		245.5	108.7
	664.7	664.7	515.1	664.7	515.1	603.1			246.1	216.7	245.4		245.4	108.4
	663.8	663.8	515	663.8	515	531			246	128.4	244.5		244.5
	663.7	663.7	469.8	663.7	469.8	514.8			245.5	108.7	238.8		238.8
	663.6	663.6	455.1	663.6	455.1	512.1			245.4	108.4	229.3		229.3
	649.2	649.2	455	649.2	455	500			244.5	1462	217.2		217.2
	649.1	649.1	384.2	649.1	384.2	499.9			238.8	1411.5	202.7		202.7
	542.9	542.9	825.1	542.9		499.4			229.3	1385.9	202.6		202.6
	495.1	495.1	725	495.1		499.3			217.2	1377.7	199.5		199.5
	721.1	825.1	709			483.2			202.7	1350.8	199		199
	541.7	725	708.9			483.1			202.6	1338	198.9		198.9
	531.2	709	603.2			482.9			199.5	1337.9	198.7		198.7
	531.1	708.9	603.1			469.1			199	1334.7	198.5		198.5
	515.2	603.2	531			366.3			198.9	1334.6	197.5		197.5
	515.1	603.1	514.8			366.2			198.7	1304.1	169.2		169.2
	515	531	512.1			366.1			198.5	1304	168.8		168.8
	469.8	514.8	500			366			197.5	1286.3	163.3		163.3
	455.1	512.1	499.9			365.9			169.2	1286.2	140.8		140.8
	455	500	499.4			349.8			168.8	1272.3	129.1		129.1
	384.2	499.9	499.3			246.3			163.3	1272.2	129		129
	811.3	499.4	483.2			246.2			140.8	1272.1	128.9		128.9
	811.2	499.3	483.1			246.1			129.1	1271.4	127.2		127.2
	811.1	483.2	482.9			246			129	1269.7	116.4		116.4
	811	483.1	469.1			212.9			128.9	1268.4	115		115
	797.1	482.9	366.3			210.7			127.2	1262.9	114.9		114.9
	797	469.1	366.2			169.5			116.4	1241.7	101.1		101.1
	796.2	366.3	366.1						115	1241.6	101		101
	796.1	366.2	366						114.9	1241.5	100.9		100.9
	796	366.1	365.9						101.1	1229.8	100.8		100.8
	780.3	366	349.8						101	1228.7	100.7		100.7
	759.3	365.9	246.3						100.9	1228.4	1064.6
	759.2	349.8	246.2						100.8	1228.3	1064.5
	758.9	246.3	246.1						100.7	1228.2	1064.4
	758.8	246.2	246						1493.8	1228.1	278
	758.3	246.1	212.9						1476.2	1228	277.2
	747.2	246	210.7						1474.1	1227.9	277.1
	726.2	212.9	169.5						1474	1227.8	216.7
	719.3	210.7	1499.7						1469	1227.7	128.4
	717.3	169.5	1499.6						1460.5	1227.6	108.7
	703.2	1067.1	1499.5						1460.4	1227.5	108.4
	702.9	1065.2	1499.4						1458.2	1227.4	1484.9
	702.8	1064.2	1497.7						1458.1	1227.1	1064.9
	665.8	841	1497.6						1456.8	1227	1064.8
	665.7	840.9	1497.3						1455.9	1226.9	1064.7
	665.6	825.2	1497.2						1404.6	1226.1	943
	664.6	825	1497						1404.5	1226	942.9
	664.5	812.1	1477.8						1403.4	1225.9	942.8
	663.9	812	1477.7						1403	1225.7	910.8
	663.5	759.1	1477.4						1393.4	1225.6	737.3
	649.3	735.1	1477.3						1382.3	1225.3	737.2
	631.2	724.7	1477.1						1363.9	1216.9	737.1
	575.4	717.2	1477						1351.4	1216.8	737
	544.2	717.1	1476.9						1315	1215.1	736.4
	544.1	706.8	1476.8						1292.2	1207.5	736.3
	543.1	665.3	1476.6						1292.1	1206.4	736.2
	543	665.2	1476.5						1292	1206.3	736.1
	541.6	665	1476.4						1278	1206.2	736
	541.5	650.2	1476.3						1277.9	1192	735.9
	531.3	649	1476.2						1248.6	1191.9	722
	516.2	604.7	1476.1						1243.7	1176.2	706.9
	516.1	604	1476						1231.7	1176.1	702.3
	516	603.3	1475.9						1216.2	1162.4	701.2
	515.9	603	1475.5						1205.2	1161.2	701.1
	511.3	591.1	1475.4						1204	1160.5	701
	495.2	591	1475.3						1201.6	1157.7	681.3
	443.7	575.1	1475.2						1201.5	1157.3	681.2
	443.6	573.2	1475.1						1195.4	1157.1	681.1
	302.5	573.1	1475						1142.4	1157	681
	217.6	571.2	1474.9						1116.6	1152.7	680.9
	201.6	571.1	1474.8						1116.5	1149.7	680.2
	128.5	571	1474.7						1115.6	1144.5	680.1
	125.7	570.9	1474.6						1115.5	1142	680
	121.1	570.1	1474.2						1079.7	1141.9	679.9
	121	569	1474.1						1079.6	1140.7	665.6
	120.9	568.9	1474						1079.5	1118	665.5
	120.8	568.8	1473.9						1079.4	1117.9	665.4
	120.7	559.2	1473.8						1079.3	1114.2	665.3
	116.9	559.1	1473.7						1079.2	1113.9	665.2
	116.7	552.8	1473.6						1079.1	1111.7	665.1
	116.6	545.2	1473.5						1078.8	1111.6	665
	111.8	545.1	1473.4						1078.7	1103.7	664.9
	107.5	541.4	1473.3						1078.6	1100.3	664.8
	101.9	530.9	1473.2						1078	1099.9	664.7
	101.8	528.2	1473.1						1077.9	1098	664.6
		528.1	1472.3						1077.8	1097.9	664.5
		517.2	1433.7						1077.7	1097.8	664.4
		517.1	1432.8						1077	1097.5	664.3
		517	1432.5						1076.9	1097.4	664.2
		514.7	1427.5						1054.2	1097.3	664.1
		514.6	1426.9						1054.1	1096.7	664
		514	1426.8						1054	1096.6	663.9
		512	1426.7						952.7	1095.5	663.8
		511.9	1426.6						952	1092.3	663.7
		511	1425.9						951.8	1087.1	663.6
		496.1	1425.8						951	1085.9	663.5
		495	1425.7						950.9	1083.9	663.4
		494.8	1425.5						949.6	1082.1	663.3
		487.2	1425.4						947.7	1082	663.2
		487.1	1425.3						932.6	1081.5	663.1
		487	1425.1						932.5	1081.4	663
		464.8	1425						932.4	1080.1	662.9
		463.2	1424.9						931.7	1075.7	662.8
		463.1	1424.8						931.6	1075.2	653
		456.8	1424.7						918.6	1075.1	640.8
		456.7	1424.6						888.6	1074.9	640.7
		456.6	1424.5						550.8	1074.8	640.2
		456.5	1424.4						550.7	1074.6	637.2
		456.4	1424.3						534.8	1074.5	637.1
		456.3	1424.2						410.7	1074.2	627
		456.2	1424.1						410.6	1074.1	626.9
		456.1	1424						341.5	1074	626.5
		449.1	1423.9						317.4	1073.9	626.4
		449	1423.8						276.1	1073	625
		444.3	1423.7						276	1068.1	624.9
		444.2	1423.6						275.9	1068	613
		442.6	1423.5						263	1067.9	598.8
		442.5	1423.4						262.9	1067.8	598.7
		442.4	1423.3						253.7	1066.4	598.6
		441.1	1423.2						247.3	1066.3	598.5
		441	1423.1						247.2	1064.1	598.4
		439	1423						203.3	1064	597.3
		438.8	1422.9						202.8	1063.9	596.9
		438.7	1422.8						199.2	1063.2	596.8
		435.2	1422.7						199.1	1062	596.7
		428	1422.6						198.8	1061.9	596.6
		424.9	1422.5						169.3	1060	576.8
		424.8	1422.4						161.3	1059.9	576.6
		424.7	1422.3						161.2	1057.4	576.5
		413	1422.2						161.1	1055.8	576.4
		412.7	1422.1						161	1052.2	576.2
		412.2	1421.9						160.9	1052.1	569.7
		412.1	1421.8						160.8	1051.9	569.6
		412	1421.7						156.8	1051.8	569.5
		411.9	1421.6						156.7	1050.1	568.7
		411.8	1421.5						154.4	1048.5	568.6
		411.7	1421.4						128.7	1048.4	568.5
		411.2	1421.1						119.3	1047.6	568.4
		411.1	1420.9						110.6	1046.3	568.3
		411	1420.8						108.8	1034.2	568.2
		410.9	1420.4						100.6	1034.1	540.7
		410.8	1420.3							1034	540.6
		398.6	1420.2							1032.1	540.5
		398.5	1420.1							1031.3	540.4
		398.4	1420							1027.9	540.3
		398	1419.9							1026.3	540.2
		382.8	1419.7							1026.2	540.1
		354.3	1419.6							1026.1	538.2
		354.2	1064.3							1026	538.1
		354.1	978.8							1023.1	536.8
		322	894.5							1022.6	532.5
		319.9	894.4							1018.7	522.6
		311.7	894.3							1018.6	522.5
		311.6	893.7							1018.2	522.4
		311.5	893.6							1017.9	522.3
		292.8	893.5							1016.5	521.1
		283.7	891.4							1016.4	521
		283.6	883.4							1016.3	518.8
		283.5	882.3							1012.6	517.7
		280.3	879.8							1012.4	517.6
		279	878.7							1010.1	506.8
		278.9	877.8							1010	506.7
		278.1	877.7							1008.1	506.6
		278	877.6							1008	506.5
		277.9	877.5							1004	506.4
		277.8	877.4							998.2	505.7
		277.1	877.3							998.1	505.6
		277	875.7							998	505.5
		276.9	875.6							997.8	505.4
		276.8	868.6							996.4	505.3
		276.7	868.5							996.3	505.2
		276.6	868.4							996.2	505.1
		273.1	868.1							995.8	505
		273	868							994.2	504.7
		264.3	867.9							994.1	504.6
		264.2	867.7							988.8	504.5
		263.2	867.6							987.9	502.7
		263.1	867.5							987.8	502.6
		263	867.4							986.2	500.6
		262.9	867.3							986	500.5
		262.8	863.7							985.9	498.7
		262.6	863.6							971.8	490.9
		249.1	863.5							971.7	490.8
		247.3	863.4							966.1	490.7
		247.1	862.6							966	490.6
		247	862.5							965	490.5
		245.9	862.4							963.8	490.4
		245.3	861.7							963.7	489.7
		245.2	861.6							962.3	489.6
		245.1	861.5							962.2	489.5
		245	861.4							962.1	489.4
		244.9	861.3							962	488.9
		244.7	860.6							958.2	488.8
		231.2	860.5							934	488.7
		231.1	860.4							933.9	488.6
		231	859.6							930.6	488.5
		230.9	859.5							925.9	486.8
		229	859.4							925	486.7
		228.9	859.3							924.9	486.6
		227.4	857.5							924.8	485.6
		227.1	849.4							924.7	485.5
		227	844.7							923.8	485.4
		226.9	844.6							920.5	485.1
		219.2	844.5							920.2	485
		219.1	844.4							920.1	484.9
		219	844.3							919.9	484.8
		218.9	843.8							919.8	484.7
		211	843.7							919.7	484.6
		210.9	843.6							919.6	478.6
		204.3	843.5							919.5	477.6
		188.9	843.4							919.4	477.5
		188.8	843.3							915.8	477.4
		188.7	843.2							902.2	476.7
		179.9	837.6							902.1	476.6
		173.9	837.5							902	476.4
		154	837.4							901.1	475.5
		148.4	836.6							900.7	475.4
		137.8	836.5							899.9	475.3
		116.5	831.7							899.6	475.2
		109.6	831.6							899.5	474.9
			831.5							898	474.8
			831.4							897.7	471.7
			830.8							897.6	471.6
			830.7							883.7	469.8
			830.6							883.6	469.7
			830.5							869.9	469.6
			830.4							855.8	468.8
			830.3							855.7	468.7
			829.9							855.6	468.6
			829.8							853.7	468.5
			829.7							841.8	468.4
			829.6							839.9	465
			829.5							839.8	464.9
			829.4							838.8	464.8
			829.3							831.9	464.7
			829.2							824	462.5
			829.1							823.9	461.8
			828.5							823.8	461.7
			828.4							823.7	461.6
			828.3							821.9	461.5
			827.9							809.8	461.1
			827.8							805.7	461
			817.8							803.8	460.9
			816.9							801.7	460.8
			816.8							788.8	460.7
			816							771.8	460.6
			815.9							770.5	460.5
			815.8							769.9	459.6
			810							769.8	459.5
			799.8							768	453.4
			799.7							767.9	453.3
			799.6							767.8	448.8
			797.8							767.7	447.6
			793.7							765.9	447.5
			793.6							765.8	445.8
			793.5							754.8	445.7
			793.4							754	445.6
			792.7							743.9	445.5
			792.6							738.8	445.4
			792.5							730.6	445.3
			792.4							727.8	441.7
			790.7							727.7	441.6
			790.6							725.8	441.5
			790.5							713.8	440.8
			789.7							709.8	440.7
			789.6							684.8	440.6
			789.5							684.7	440.5
			787.7							683.7	440.4
			787.6							683.6	440.3
			787.5							681.5	435.7
			787.4							679.3	434.6
			786.8							666.8	434.5
			786.7							661.8	433.7
			786.6							653.7	433.6
			786.5							643.8	432.2
			776.4							631.9	431.8
			776.3							631.8	431.7
			775.3							629.9	431.6
			773.6							629.8	431.5
			773.5							627.8	431.4
			773.1							627.7	431.3
			773							584.7	430.7
			772.9							582.9	430.6
			768							582.7	430.5
			766.1							581.7	430.4
			763.5							558.1	430.3
			762.6							526.8	427.3
			762.5							526.7	427.2
			761.7							519.9	427.1
			761.6							513.8	419.8
			761.5							513.7	419.7
			754.4							512.9	419.6
			753.7							512.8	418.9
			748.6							512.7	418.8
			748.5							512.6	418.7
			747.7							512.5	418.6
			739.6							497.8	418.5
			739.5							482.3	418.4
			724.9							482.2	417.8
			722.2							482.1	417.7
			722.1							482	417.6
			722							481.8	417.5
			721.9							481.7	417.4
			721.2							481.6	417.3
			708.1							408.7	417.2
			707.2							394.8	417.1
			703.4							394.7	417
			692.2							394.6	416.9
			692.1							314.1	416.8
			691.9							298.3	416.7
			681.3							298.2	416.6
			679.1							298.1	416.5
			638							269	416.4
			632.1							268.9	416.3
			632							268.8	416.2
			629.7							256	416.1
			629.6							255.2	415.6
			625.2							255.1	415.5
			625.1							212.1	407.4
			625							212	407.3
			619							190.2	406.6
			616.1							186.2	405.8
			613.1							186.1	405.7
			604.1							186	405.6
			597.3							185.9	404.7
			592.1							185.8	404.6
			592							185.7	404.5
			589.9							169.8	404.1
			589.8							169.6	404
			583.6							161.4	403.8
			583.5							160.3	403.7
			578.3							160.2	403.6
			569.8							160.1	403.5
			568.7							160	402.9
			568.6							159.9	402.8
			568.5							159.6	402.7
			568.4							157.9	402.6
			568.3							143.6	402.5
			556.6							135.8	402.4
			556.5							129.4	402.3
			549.9							125.4	401.8
			542.8							124.3	401.7
			541.8							124.2	401.6
			540.8							124.1	401.5
			540.7							124	401.4
			540.6							123.9	401.1
			540.5							115.5	401
			540.4							109.6	400.9
			540.3							106.2	400.8
			540.2							106.1	400.7
			536.2							106	400.6
			535.9							105.9	400.5
			534.5							105.8	400.4
			534.4								400.3
			533.8								400
			521.2								399.9
			521.1								399.8
			520.1								399.7
			520								399.6
			519.9								399.5
			514.2								399.4
			513.1								399.3
			513								395.8
			512.9								391.7
			512.3								390.7
			512.2								390
			500.2								389.9
			500.1								389.8
			499.2								389.7
			499.1								389.6
			499								389.5
			498.2								389.1
			498.1								389
			498								388.9
			497.9								388.8
			497.2								388.7
			488.5								388.6
			484.3								388.5
			484.2								387.9
			484.1								387.8
			484								387.7
			483.9								387.6
			483								386.8
			480.5								386.7
			478.2								386.6
			478.1								386.5
			477								386.4
			475.9								386.3
			470								386.2
			469.9								385.9
			469								385.8
			468.8								385.7
			468.7								385.6
			468.6								385.5
			468.5								385.4
			468.4								385.3
			468.3								385.2
			468.1								385.1
			467.8								384.9
			462.4								384.8
			462.3								384.7
			462.2								384.6
			462.1								378.7
			462								377.7
			461.9								376.8
			461.8								376.7
			461.7								376.6
			461.6								375.9
			461.4								375.8
			461.3								375.7
			454.9								375.6
			453.9								375.5
			451.9								375.4
			450.2								375
			450.1								374.9
			450								374.8
			449.9								374.7
			448.3								374.6
			448.2								374.5
			448.1								374.4
			448								374.3
			441.7								374.1
			441.6								374
			440.8								373.9
			440.7								373.8
			440.6								373.7
			440.5								373.6
			440.4								373.5
			440.3								373.4
			440.2								373.3
			440								373.2
			431.8								373.1
			431.7								373
			431.6								372.9
			431.5								372.8
			431.4								372.7
			431.3								372.6
			431.2								372.5
			430.8								372.4
			430.7								372.3
			430.6								372.2
			430.5								371.7
			430.4								371.6
			430.3								371.5
			430.2								371.4
			430.1								370.9
			429.5								370.7
			417.5								370.6
			417.4								370.5
			417.3								370.4
			417.2								370.3
			417.1								369.7
			416.5								369.6
			416.4								369.5
			416.3								369.4
			416.2								369.3
			407.9								369.2
			404.3								369.1
			404.2								369
			404.1								368.9
			404								368.8
			403.9								368.7
			402.2								368.6
			384.3								368.5
			384.1								368.4
			384								364.8
			383.9								362.7
			383.3								362.6
			383.2								362.5
			383.1								362.4
			383								362.3
			382.9								362.2
			382.3								362.1
			382.2								362
			382.1								361.9
			382								361.8
			381.9								361.7
			381.3								361.6
			381.2								361.5
			381.1								361.4
			381								361.2
			380.9								361.1
			366.4								361
			365.8								360.9
			365.7								360.8
			365								360.7
			364.9								360.6
			364.8								360.5
			364.7								360.4
			362.4								360.3
			362.3								360.2
			362.2								360.1
			362.1								360
			362								359.9
			349.9								359.8
			349.5								359.7
			343.2								359.6
			343.1								359.5
			343								359.4
			342.9								359.3
			333.3								359.2
			324.9								359.1
			320.1								359
			320								358.9
			319.8								358.8
			316.7								358.7
			316.6								358.6
			316.5								358.5
			316.4								358.4
			301.1								358.3
			300.7								358.2
			300.6								358.1
			300.5								357.8
			300.4								357.7
			300.3								357.6
			299.7								357.5
			289								357.4
			277.5								357.3
			269.2								357.2
			269.1								357.1
			268.3								357
			268.2								356.8
			268.1								356.7
			268								356.6
			267.9								356.5
			267.8								356.4
			258.2								356.3
			257.6								356.2
			257.5								356.1
			257.3								355.8
			255.6								355.7
			255.5								355.6
			255.4								355.5
			253.5								355.4
			243.4								355.2
			243.3								355.1
			242.2								355
			239.5								354.9
			239.4								346.7
			232.3								346.6
			229.3								346.5
			228.2								345.7
			228.1								345.1
			226.5								345
			225.9								344.9
			225.3								344.8
			223.7								344.7
			217.5								344.6
			217.4								344.5
			217.3								344.4
			216.6								342.7
			216.5								342.6
			216.4								342.5
			216.3								342.4
			216.2								341.4
			216.1								341.3
			215.3								341.2
			213.7								341.1
			213								341
			212.3								340.9
			212.2								340.8
			212.1								340.7
			212								340.6
			211.9								340.5
			209.5								340.4
			209.4								339.6
			209.3								339.4
			205.4								339
			198.6								338.9
			197.4								338.8
			197.3								338.7
			197.2								338.6
			197.1								338.5
			197								338.4
			195.4								338.3
			195.3								338.2
			194.3								336.9
			193.3								336.8
			191.4								336.7
			186.5								334.9
			186.4								334.8
			186.3								334.7
			186.2								334.6
			186								332.7
			185.9								332.6
			185.8								330.7
			185.6								330.6
			185.4								330.5
			183.3								328.7
			183.2								328.6
			179.2								327.4
			179.1								327.3
			177.3								327
			177.2								326.9
			177.1								326.8
			172.5								326.6
			172.3								326.5
			172.2								326.4
			169.4								325.7
			169.3								325.6
			169.2								324.6
			169.1								324.5
			169								324.4
			168.3								322.7
			168.2								322.6
			168.1								322.5
			168								322.4
			166.4								322.3
			165.2								321.6
			165.1								321.5
			165								321.4
			163.3								321.3
			163.2								321.2
			159.4								321.1
			159.3								321
			159.2								320.9
			159.1								320.8
			156.4								320.7
			156.3								320.6
			155.4								318.6
			155.3								318.5
			155.2								318.4
			155.1								318.3
			147.3								317.8
			147.2								317.7
			147.1								317.6
			147								316.7
			146.4								316.6
			146.3								316.5
			146.2								316.4
			146.1								316.3
			145.4								315.8
			145.2								315.7
			145.1								314.6
			145								313.4
			144.9								313.3
			144.3								312.8
			143.4								312.7
			143.2								312.6
			142.2								312.5
			141.4								312.4
			141.2								310.7
			141.1								310.6
			137.1								310.5
			133.4								310.4
			133.2								308.7
			131.5								308.6
			131.2								308.5
			127.5								306.5
			127.4								305.8
			127.2								305.7
			127.1								305.6
			127								304.8
			126.9								304.7
			126.8								304.6
			125.2								304.5
			125.1								302.4
			125								301.7
			124.9								301.6
			117.4								301.5
			117.3								301.4
			117.2								300.8
			115.3								300.7
			115.2								300.6
			115.1								300.5
			115								300.4
			114.9								300.3
			114.8								300.2
			113.3								300.1
			113.2								299.7
			113.1								299.6
			113								299.4
			112.9								299.3
			112								298.7
			111								297.5
			109.8								297.4
			109.7								296.7
			108.2								296.6
			108.1								296.5
			108								293.7
			105.8								290.8
			105.2								290.7
			104								289
			101.3								288.9
			101.2								288.8
			101.1								288.7
			101								288.6
			100.9								288.5
											288.3
											288.2
											288.1
											288
											287.7
											286.6
											285.7
											285.6
											285.5
											285.4
											284.8
											284.7
											284.6
											283.6
											283.5
											283.4
											282.6
											282.5
											281.6
											281.5
											279.6
											279.5
											278.7
											278.5
											278.1
											277.9
											277.3
											274.4
											274.3
											272.7
											272.6
											272.5
											272.4
											272.3
											272.2
											272.1
											271.7
											271.6
											271.5
											271.4
											271.3
											268.6
											267.7
											267.6
											267.5
											267.4
											267
											266.9
											266.7
											266.6
											266.5
											266.4
											265.6
											265.5
											265.4
											264.9
											264.8
											264.7
											264.6
											264.5
											263.8
											263.7
											262.5
											260.8
											260.7
											260.6
											260.5
											259.6
											258.7
											258.6
											258.5
											257.6
											257.5
											257.4
											256.8
											256.7
											256.6
											256.5
											256.4
											254.5
											254.4
											253.6
											253.5
											252.5
											252.4
											251.5
											250.7
											247.6
											247.5
											247.4
											245.9
											245.8
											245.7
											245.6
											245.3
											245.2
											245.1
											244.6
											244.4
											244.3
											243.9
											243.8
											243.7
											243.6
											243.5
											242.4
											242.3
											241.5
											241.4
											240.3
											239.6
											239.5
											239.4
											239.3
											239.2
											239
											238.9
											238.7
											238.6
											238.5
											238.4
											238.3
											237.7
											236.7
											236.4
											236.3
											235.5
											235.4
											230.7
											230.6
											230.5
											230.4
											230.1
											230
											229.9
											229.7
											229.6
											229.5
											229.4
											229.2
											228.7
											228.6
											228.5
											228.4
											228.3
											228.2
											228.1
											228
											227.9
											227.6
											227.4
											226.4
											226.3
											226.2
											226.1
											225.4
											224.6
											222.6
											222.5
											222.4
											222
											221.7
											221.6
											221.5
											220.5
											220.4
											217.4
											217.3
											217.1
											217
											216.9
											216.6
											216.5
											216.4
											216.3
											216.2
											216.1
											216
											215.9
											209.6
											209.5
											208.4
											207.7
											207.6
											207.5
											207.4
											206.8
											206.7
											206.6
											206.5
											203.5
											202.5
											202.4
											202.3
											202.2
											202.1
											202
											201.9
											201.8
											200.7
											200.6
											200.5
											200.4
											199.4
											198.6
											198.4
											198.3
											198.2
											198.1
											198
											197.9
											197.8
											197.6
											195.3
											195.2
											195.1
											194.6
											193.7
											193.6
											193.5
											193.3
											193.2
											193.1
											193
											192.9
											192.7
											192.6
											192.5
											192.4
											192
											191.9
											191.8
											191.6
											191.4
											191.3
											186.4
											183.7
											183.5
											183.4
											180.3
											180.2
											180.1
											179.7
											178.4
											178.3
											176.7
											176.6
											176.5
											172.4
											169.4
											169.1
											169
											168.9
											166.7
											166.6
											163.6
											163.5
											163.2
											163.1
											163
											162.9
											162.8
											162.7
											162.6
											162.5
											162.4
											158.7
											158.6
											158.5
											158.4
											156.9
											155.4
											155.2
											155.1
											155
											154.9
											154.8
											152.7
											152.6
											152.4
											150.4
											149.1
											149
											148.9
											148.8
											148.7
											148.6
											148.5
											145.2
											145.1
											145
											144.9
											144.8
											144.7
											144.6
											144.5
											143.4
											142.9
											142.7
											142.6
											141.2
											141.1
											141
											140.9
											138.8
											138.6
											136.8
											136.7
											136.6
											135.2
											135.1
											135
											134.9
											134.8
											134.7
											134.6
											134.5
											134.4
											130.6
											130.5
											130.4
											128.8
											127.1
											127
											126.9
											126.8
											126.7
											126.6
											126.5
											126.4
											123.3
											123.2
											121.6
											120.7
											120.6
											120.5
											119.4
											117.2
											117.1
											117
											116.9
											116.8
											116.7
											116.6
											115.2
											115.1
											114.8
											114.7
											114.6
											114.5
											111.4
											111
											110.9
											110.8
											104.7
											104.5
											102.7
											102.6
											102.5
											102.4
											101.2
											100.2
											100.1
											100
aPaired students T-test, P<0.05
