# Supplementary material for: Metabolomics Differences of Glycine max QTLs Resistant to Soybean Looper
Source: Metabolites. 2021 Oct 19;11(10):710. doi: 10.3390/metabo11100710 (PMC8539317; doi:10.3390/metabo11100710)
Supplement: Supplementary file 1 [file metabolites-11-00710-s001.zip › Table S2 - Identifications in positive ion mode.xlsx]

## Sheet: Positive fragment tables
Observed Molecular Ion (m/z)	Putative Identification(s)	Putative Precursor Ion Type	Precursor Ion Mw	Compound Mw	Observed Fragment Ions in MS (m/z)	Database fragment Ions (m/z)	Confidence level *	Database references	Comment
Sig down in all 3 mock-treated genotypes compared to benning (SAMPLE: BENNING MOCK )
381	Sucrose	[M+K]+	381.079	381.079	381.3, 219.1, 201.0, 380.4, 382.3, 379.3, 353.3, 349.3, 335.3, 354.3	200.9, 219.0, 363.3, 362.3, 315.0, 333.1, 344.2, 291.1, 302.9, 309.4	Level 3	NIST-MS/MS	In high resolution only 219 and 201
218	Securinine	[M+H]+	218.057	217.11	172.0, 218.2, 158.0, 174.0, 190.0, 156.0, 154.0, 176.1, 186.1, 130.0	172.0, 81.9, 162	Level 3	MoNa
219	Chrysanthemic acid, ethyl ester	[M+Na]+	219.11	196.146	159.0, 173.0, 143.0, 126.9, 128.9, (144.8, 176.9, 219.1, 171.0, 157.0)	159.1, 144.9, 217.1, 219.2, 131.0, 221.0, 158.0, 161.0, 218.1, 160.0	Level 3	MoNa
	C10H16N2O2	[M+Na]+	219.11	196.121	159.0, 173.0, 143.0, 126.9, 128.9, (144.8, 176.9, 219.1, 171.0, 157.0)	159.0, 144.0, 219.0, 142.0, 105.0, 201.0, 135.0, 146.0, 91.0, 141.0	Level 3	MoNa
188.9	Aureonitol	[M+H-H2O]+	189.127	206.131	171.1, 143.0, 161.0, 145.0, 147.0, 189.1, 133.0, 156.8, 159.0, 129.0	171.1, 161.1, 145.1, 143.1, 147.1, 131.1, 159.1, 129.1, 105.1, 133.1	Level 3	NIST-MS/MS
	Azelaic acid	[M+H]+	189.113	188.105	171.1, 143.0, 161.0, 145.0, 147.0, 189.1, 133.0, 156.8, 159.0, 129.0	125.1, 97.1, 55.0, 83.0, 171.1, 81.0, 135.0, 143.1, 107.1, 148.0	Level 3	MoNa
249.1	C15H20O3	[M+H]+	249.149	248.141	203.0, 231.1, 221.1, 171.0, 189.0, 128.9, 213.1, 185.0, 249.1, 167.0	231.1, 203.1, 185.1, 213.1, 203.1, 173.1, 189.1, 195.1, 231.1, 171.1	Level 3	NIST-MS/MS
	1-Hydroxy-4(15),11(13)-eudesmadien-12,6-olide	[M+H]+	249.149	248.141	203.0, 231.1, 221.1, 171.0, 189.0, 128.9, 213.1, 185.0, 249.1, 167.0	231.1, 249.2, 185.1, 203.1, 171.1, 213.1, 189.1, 145.1, 173.1, 161.1	Level 3	NIST-MS/MS
	Pterosin A	[M+H]+	249.149	248.141	203.0, 231.1, 221.1, 171.0, 189.0, 128.9, 213.1, 185.0, 249.1, 167.0	203.1, 231.1, 185.1, 213.1, 249.1, 170.1, 157.1, 201.1, 163.1, 133.1	Level 3	MoNa
263.1	Neosolaniol (matching score: acceptable)	MS3 for [263.1]+	263.1	382.163	245.1, 231.1, 185.0, 171.0, 169.0, 199.0, 143.0, 157.0, 217.1, 195.0	245.1, 217.1, 199.1, 215.1, 227.1, 161.1, 233.1, 189.1, 175.1, 235.1	Level 3	NIST-MS/MS
277	Gliocladic acid	[M+Na]+	277.141	254.152	259.1, 245.1, 199.0, 235.2, 157.0, 185.0, 277.3, 167.0, 183.0, 143.0	259.1, 245.1, 241.1, 217.1, 203.0, 276.1, 277.1, 249.1, 229.1, 235.1	Level 3	NIST-MS/MS
	Daidzein	[M+Na]+	277	254.058	259.1, 245.1, 199.0, 235.2, 185.0, 157.0, 277.2, 167.0, 231.2, 233.1	277.2, 235.3, 219.1, 259.3, 231.2, 245.2, 209.0, 189.1, 161.0, 233.2	Level 1	Reference standard match
499.2	Cirsimarin	[M+Na]+	499.121	476.132	305.3, 499.4, 337.1, 481.3, 484.4, 319.2, 277.0, 217.0, 471.4, 455.3	337.1, 499.1, 322.0, 484.1, 315.1, 397.1, 197.1, 301.1, 387.0, 409.1	Level 3	NIST-MS/MS
	C27H48O9	[M+H-H2O]+	499.327	516.33	305.3, 499.4, 337.1, 481.3, 484.4, 319.2, 277.0, 217.0, 471.4, 455.3	337.3, 481.3, 445.3, 463.3, 263.2, 371.3, 373.3, 245.2, 353.2, 389.3	Level 3	NIST-MS/MS
515.2	Cucurbitacin I (Matching score is poor)	[M+H]+	515.3	514.293	497.4, 487.4, 515.4, 471.3, 500.4, 486.4, 459.4, 473.5, 516.7, 381.1	497.3, 483.2, 339.2, 479.3, 461.3, 419.3, 367.2, 329.2, 365.2, 323.2	Level 3	NIST-MS/MS
717.3	Mulberrofuran T	[M+H]+	717.3	716.298	659.5, 699.5, 717.7, 685.5, 625.5, 521.5, 611.5, 687.6, 536.4, 607.7	539.2, 205.0, 69.0, 661.2, 699.3, 717.3, 677.2, 687.3, 659.2, 607.3	Level 3	HMDB
Sig up in all 3 mock-treated genotypes compared to benning (SAMPLE: BENNING MOCK EM)
815	Goyaglycoside h	[M+H]+	815.479	814.471	814.8, 536.7, 782.7, (770.8)	653.4, 635.4, 491.3, 473.3, 455.3, 437.3	Level 4	Saponins MS database	Differences in the fragmentation might be due to the differences in the collision energy.***
104	Benzonitrile	[M+H]+	104.05	103.042	103.4, 77.4, 104.4, (78.3, 102.3, 95.5)	103.0, 76.0, 104.0, 77.0, 50.0, 52.0, 39.0, 63.0, 102.0, 56.0	Level 3	MoNa
893.5	Soyasaponin ya	[M+H]+	893.49	892.482	637.8, 894.0, 861.0, 615.8, 847.0, 857.0, 862.1, 849.1, 833.9, 858.0	Fragmentation pattern is not available	Level 4	Literature
978.8	Soyasaponin Bd	[M+Na]+	979.484	956.498	699.9, 698.9, 979.1, 697.9, 816.0, 700.9, 942.0, 920.2, (946.1, 943.0)	795.4, 633.4, 457.4, 439.4	Level 4	Saponins MS database	Differences in the fragmentation might be due to the differences in the collision energy.***
	Quercetin Pentamethyl Ether	[M+H]+	373.293	372.121	356.8, 372.8, 357.8, 251.7, 328.8, (236.6, 327.7, 284.7, 329.8)	340.2, 312.2, 343.1, 269.1, 241.1, 297.0, 327.1, 294.1, 329.2, 315.1	Level 3	MoNa
358.4	5-Hydroxy-2',4',7,8-tetramethoxyflavone	[M+H]+	359.22	358.105	342.7, 343.8, 358.8, 237.6, 251.6, 314.7, (340.6, 313.7, 222.6, 236.6)	359.1, 326.1, 344.1, 360.1, 298.1, 343.1, 327.1, 313.1, 345.0, 282.1	Level 3	MoNa
324.4	N-Acetyl-D-galactosamine 4-sulfate	[M+Na]+	324.036	301.047	175.6, 280.7, 150.5, 324.8, 294.7, 296.6, 122.5, 306.6, (148.5, 106.4)	175.1, 280.1, 150.1, 306.2, 291.1, 305.3, 292.1, 294.3, 122.0, 148.1	Level 3	NIST-MS/MS
277.2	Gliocladic acid	[M+Na]+	277.141	254.152	259.6, 199.5, 217.5, 245.5, 233.5, 249.5, 235.5, 167.4, 157.4, 262.6	259.1, 245.1, 241.1, 217.1, 203.0, 276.1, 277.1, 249.1, 229.1, 235.1	Level 3	NIST-MS/MS
	Daidzein	[M+Na]+	277	254.058	259.1, 245.1, 199.0, 235.2, 185.0, 157.0, 277.2, 167.0, 231.2, 233.1	277.2, 235.3, 219.1, 259.3, 231.2, 245.2, 209.0, 189.1, 161.0, 233.2	Level 1	Reference standard match
Sig up in all 3 mock-treated genotypes compared to benning (SAMPLE: BENNING MOCK M)
815	Goyaglycoside h	[M+H]+	815.479	814.471	536.5, 535.4, 520.5, 519.5, (782.7, 815.8, 796.7, 815.1, 755.6, 652.6)	653.4, 635.4, 491.3, 473.3, 455.3, 437.3	Level 4	Saponins MS database	Differences in the fragmentation might be due to the differences in the collision energy.***
104	Choline	[M]+	104.107	104.107	59.9, 104.0, (57.9, 86.9, 85.9)	60.0, 104.1, 58.0, 59.0	Level 3	MoNa
861.6	TG(18:4(6Z,9Z,12Z,15Z)	[M+H]+	861.734	860.726	583.5, 843.6, 829.6, 519.5, 817.6, 601.4, 535.4, 775.6, 567.5, 365.3	259.2, 253.3, 585.5, 317.2, 217.2, 231.2, 241.2, 609.5, 311.3, 591.4	Level 3	HMDB
893.5	Soyasaponin ya	[M+H]+	893.49	892.482	637.4, 615.4, 861.6, 857.7, 893.7, 875.5, (539.5, 847.6, 813.7, 614.6)	Fragmentation pattern is not available.	Level 4	Literature
978.8	Soyasaponin Bd	[M+Na]+	979.484	956.498	700.5, 699.5, 698.6, 934.7, 979.8, 816.7, 960.7, 978.9, 697.6, 946.8	795.4, 633.4, 457.4, 439.4	Level 4	Saponins MS database	Differences in the fragmentation might be due to the differences in the collision energy.***
133.2	L-Methionine	[M+H-NH3]+	133.032	149.051	133.0, 105.0, 90.9, 86.9, 114.9, (88.9, 72.9, 54.9, 100.8, 70.9)	87.0, 61.0, 85.0, 45.0, 57.0, 59.0, 133.0, 53.0, 75.0, 105.0	Level 3	NIST-MS/MS
	Trans-cinnamaldehyde	[M+H]+	133.07	132.058	133.0, 105.0, 90.9, 86.9, 114.9, (88.9, 72.9, 54.9, 100.8, 70.9)	133.0, 105.1, 91.0, 134.0, 115.0, 55.0, 131.1, 93.0, 103.0, 79.0	Level 3	MoNa
	Cuminyl alcohol	[M+H-H2O]+	133.101	150.105	133.0, 105.0, 90.9, 86.9, 114.9, (88.9, 72.9, 54.9, 100.8, 70.9)	133.1, 105.0, 91.0, 131.0, 118.0, 115.0, 93.0, 79.0, 89.0, 134.1	Level 3	MoNa
Sig up in all 3 mock-treated genotypes compared to benning (SAMPLE: BENNING MOCK E)
104	Benzonitrile	[M+H]+	104.05	103.042	78.1, 77.1, 104.2, 103.2, (96.2, 76.1)	103.0, 76.0, 104.0, 77.0, 50.0, 52.0, 39.0, 63.0, 102.0, 56.0	Level 3	MoNa
133.2	L-Methionine	[M+H-NH3]+	133.032	149.051	87.2, 105.2, 133.3, 88.1, 91.2, (115.2, 103.2, 79.2, 98.2, 131.3)	87.0, 61.0, 85.0, 45.0, 57.0, 59.0, 133.0, 53.0, 75.0, 105.0	Level 3	NIST-MS/MS
	Trans-cinnamaldehyde	[M+H]+	133.07	132.058	87.2, 105.2, 133.3, 88.1, 91.2, (115.2, 103.2, 79.2, 98.2, 131.3)	133.0, 105.1, 91.0, 134.0, 115.0, 55.0, 131.1, 93.0, 103.0, 79.0	Level 3	MoNa
	Cuminyl alcohol	[M+H-H2O]+	133.101	150.105	87.2, 105.2, 133.3, 88.1, 91.2, (115.2, 103.2, 79.2, 98.2, 131.3)	133.1, 105.0, 91.0, 131.0, 118.0, 115.0, 93.0, 79.0, 89.0, 134.1	Level 3	MoNa
Sig down in 2 insect-treated genotypes compared to benning (SAMPLE: BENNING INSECT)
663	Goyaglycoside C	[M+H]+	663.447	662.439	630.6, 619.5, 631.6, 617.8, 501.5, 635.8, 636.8, 618.6, 612.6, 500.5	Database shows 100% Match Rate - Database fragmentation pattern is not available.**	Level 3	Saponins MS database
	Goyaglycoside D	[M+H]+	663.447	662.439	630.6, 619.5, 631.6, 617.8, 501.5, 635.8, 636.8, 618.6, 612.6, 500.5	Database shows 100% Match Rate - Database fragmentation pattern is not available.**	Level 3	Saponins MS database
	Plantamajoside	[M+Na]+	663.19	640.2	630.6, 619.5, 631.6, 617.8, 501.5, 635.8, 636.8, 618.6, 612.6, 500.5	501.1, 483.2, 502.1, 484.1, 509.1, 303.1, 301.1, 321.1, 329.1, 347.1	Level 3	NIST-MS/MS
664	Plantamajoside	[M+Na]+	663.19	640.2	631.6, 617.8, 619.5, 636.7, 664.7, 635.8, 551.6, 501.5, 495.6, 618.6	501.1, 483.2, 502.1, 484.1, 509.1, 303.1, 301.1, 321.1, 329.1, 347.1	Level 3	NIST-MS/MS
815	Goyaglycoside h	[M+H]+	815.479	814.471	536.6, 535.6, 782.7, 770.7, 815.7, 814.8, 652.7, 764.7, 728.6, 778.8	653.4, 635.4, 491.3, 473.3, 455.3, 437.3	Level 4	Saponins MS database	Differences in the fragmentation might be due to the differences in the collision energy.***
104	Benzonitrile	[M+H]+	104.05	103.042	78.2, 104.2, 77.1, 103.2, (96.2, 71.2, 60.2)	103.0, 76.0, 104.0, 77.0, 50.0, 52.0, 39.0, 63.0, 102.0, 56.0	Level 3	MoNa
Sig up in 2 insect-treated genotypes compared to benning (SAMPLE: BENNING INSECT EM)
277	Gliocladic acid	[M+Na]+	277.141	254.152	277.5, 276.7, 249.5, 234.6, (235.5, 205.3, 247.6, 231.5, 245.4, 246.6)	259.1, 245.1, 241.1, 217.1, 203.0, 276.1, 277.1, 249.1, 229.1, 235.1	Level 3	NIST-MS/MS
	Daidzein	[M+Na]+	277	254.058	259.1, 245.1, 199.0, 235.2, 185.0, 157.0, 277.2, 167.0, 231.2, 233.1	277.2, 235.3, 219.1, 259.3, 231.2, 245.2, 209.0, 189.1, 161.0, 233.2	Level 1	Reference standard match
381	Sucrose	[M+K]+	381.079	381.079	219.4, 201.4, 348.7, 381.6, 349.6, 321.5, 320.5, 337.5, 336.5, 335.6	200.9, 219.0, 363.3, 362.3, 315.0, 333.1, 344.2, 291.1, 302.9, 309.4	Level 3	NIST-MS/MS
137.8	1-Methylnicotinamide cation	[M]+	137.071	137.071	94.3, 137.4, 91.3, 107.3, 95.3, 109.4, 79.3, 77.3, 67.3, (92.3)	94.0, 137.1, 92.0, 77.9, 66.9, 110.0, 52.9, 64.9, 96.0, 80.0	Level 3	NIST-MS/MS
	Threonic acid	[M+H]+	137.045	136.037	94.3, 137.4, 91.3, 107.3, 95.3, 109.4, 79.3, 77.3, 67.3, (92.3)	95.0, 55.0, 137.0, 67.0, 51.5, 68.0, 69.3, 98.0, 93.2, 66.0	Level 3	MoNa
482	Albiflorin	[M+H]+	481.17	480.163	482.5, 319.6, (437.8, 301.7, 421.8, 449.6, 435.8, 451.7, 439.6, 391.8)	197.1, 481.2, 319.1, 482.2, 320.1, 301.1, 198.1, 105.0, 179.1, 359.1	Level 3	NIST-MS/MS
Sig up in 2 insect-treated genotypes compared to benning (SAMPLE: BENNING INSECT M)
277	Gliocladic acid	[M+Na]+	277.141	254.152	262.5, 249.5, 234.5, 277.5, 221.5, 259.5, 231.5, 233.5, 248.6, 120.4	259.1, 245.1, 241.1, 217.1, 203.0, 276.1, 277.1, 249.1, 229.1, 235.1	Level 3	NIST-MS/MS
	Daidzein	[M+Na]+	277	254.058	259.1, 245.1, 199.0, 235.2, 185.0, 157.0, 277.2, 167.0, 231.2, 233.1	277.2, 235.3, 219.1, 259.3, 231.2, 245.2, 209.0, 189.1, 161.0, 233.2	Level 1	Reference standard match
137.8	1-Methylnicotinamide cation	[M]+	137.071	137.071	94.3, 137.4, 95.3, 91.3, 107.3, 109.4, 93.3, 92.3, (120.4, 110.3)	94.0, 137.1, 92.0, 77.9, 66.9, 110.0, 52.9, 64.9, 96.0, 80.0	Level 3	NIST-MS/MS
	Threonic acid	[M+H]+	137.045	136.037	94.3, 137.4, 95.3, 91.3, 107.3, 109.4, 93.3, 92.3, (120.4, 110.3)	95.0, 55.0, 137.0, 67.0, 51.5, 68.0, 69.3, 98.0, 93.2, 66.0	Level 3	MoNa
147	1H-1,3-Benzodiazole-5-carbaldehyde	[M+H]+	147.055	146.048	119.4, 91.3, 147.4, 102.3, 92.3, 118.4, (103.3, 104.4, 105.3, 101.3)	92.0, 119.0, 65.0, 118.0, 147.0, 91.0, 110.0, 93.0, 120.1, 150.0	Level 3	NIST-MS/MS
	3-Chloro-5,7-dihydroxy-4-methylcoumarin	[M+H-CHClO2]+	147.044	226.003	119.4, 91.3, 147.4, 102.3, 92.3, 118.4, (103.3, 104.4, 105.3, 101.3)	147.0, 91.0, 65.0, 69.0, 119.0, 129.0, 77.0, 101.0, 129.0, 105.0	Level 3	NIST-MS/MS
	2-benzylprop-2-enal	[M+H]+	147.081	146.073	119.4, 91.3, 147.4, 102.3, 92.3, 118.4, (103.3, 104.4, 105.3, 101.3)	147.1, 91.0, 69.0, 55.0, 93.0, 119.0, 117.0	Level 3	HMDB
482	Albiflorin	[M+H]+	481.17	480.163	301.7, 453.7, 303.7, 319.6, 454.7, 452.6, 421.7, 451.7, 449.7, 482.7	197.1, 481.2, 319.1, 482.2, 320.1, 301.1, 198.1, 105.0, 179.1, 359.1	Level 3	NIST-MS/MS
Sig up in 2 insect-treated genotypes compared to benning (SAMPLE: BENNING INSECT E)
381	Sucrose	[M+K]+	381.079	381.079	219.3, 201.3, 348.6, 321.4, 304.4, 381.6, 335.4, 245.4, 320.4, 319.4	200.9, 219.0, 363.3, 362.3, 315.0, 333.1, 344.2, 291.1, 302.9, 309.4	Level 3	NIST-MS/MS
147	1H-1,3-Benzodiazole-5-carbaldehyde	[M+H]+	147.055	146.048	119.3, 147.3, 91.3, (103.2)	92.0, 119.0, 65.0, 118.0, 147.0, 91.0, 110.0, 93.0, 120.1, 150.0	Level 3	NIST-MS/MS
	3-Chloro-5,7-dihydroxy-4-methylcoumarin	[M+H-CHClO2]+	147.044	226.003	119.3, 147.3, 91.3, (103.2)	147.0, 91.0, 65.0, 69.0, 119.0, 129.0, 77.0, 101.0, 129.0, 105.0	Level 3	NIST-MS/MS
	2-benzylprop-2-enal	[M+H]+	147.081	146.073	119.3, 147.3, 91.3, (103.2)	147.1, 91.0, 69.0, 55.0, 93.0, 119.0, 117.0	Level 3	HMDB
Top 10 highest intensity peaks are provided from the unknowns ms/ms spectra and the putative compounds spectra from databases.
On the unknowns ms/ms peak list column (observed fragment ions in MS) the bold numbers (m/z) are seen among the top 10 highest intensity peaks of the database
The numbers with underline, are not among the top 10, but available among the database peaks.
For some peaks, more than one putative identity is shown.
* Confidence levels as proposed by Blaženović et al., 2018. Metabolites, 8(2), 31. https://doi.org/10.3390/metabo8020031
	Confidence Level Description Minimum Data Requirements
	Level 0
	Unambigous 3D structure: Isolated, pure compound, including full stereochemistry.
	Following natural product guidelines, determination of 3D structure.
	Level 1
	Confident 2D structure: uses reference standard match or full 2D structure elucidation.
	At least two orthogonal techniques defining 2D structure confidently, such as MS/MS and RT or CCS.
	Level 2
	Probable structure: matched to literature data or databases by diagnostic evidence.
	At least two orthogonal pieces of information, including evidence that excludes all other candidates
	Level 3
	Possible structure or class: Most likely structure, isomers possible, substance class or structure match.
	One or several candidates possible, requires at least one piece of information supporting the proposed candidate.
	Level 4
	Unkown feature of interest.
	Presence in sample
** The SMSD is freely accessible at Huang et al.,2020. Journal of Chromatography A , 1625, 461296. https://doi.org/10.1016/j.chroma.2020.461296
*** Differences in the fragmentation might be due to the differences in the collision energy: SMSD does not provide the collision energy used for fragmantation of the samples.
Collision energy is an important variable in ms/ms and the difference in this factor might be the reason the fragmentation patterns do not match.
